# Supplementary material for: CA-125 ELIMination Rate Constant K (KELIM) Is a Marker of Chemosensitivity in Patients with Ovarian Cancer: Results from the Phase II CHIVA Trial
Source: Oxford University Press journal article supplement (doi:10.1158/1078-0432.ccr-20-0054), 2020-03-24
Supplement: 10780432ccr200054-sup-235134_2_supp_6150213_q6zn6d.docx [file 10780432ccr200054-sup-235134_2_supp_6150213_q6zn6d.docx]

Supplementary Table 4. Multivariate logistic model regarding the likelihood of complete IDS.

| N = 134 | Final Logistic Model | | | |
| --- | --- | --- | --- | --- |
|  | Estimate | OR | 95% CI | P |
| Intercept | -2.20 | 0.11 | [0.04-0.27] | < 0.001 |
| Std KELIM (continuous) | 2.78 | 16.13 | [5.51-53.38] | < 0.001 |

Std KELIM = KELIM / 0.07; OR = odds-ratio; 95% CI: 95% confidence interval
