# Supplementary material for: CA-125 ELIMination Rate Constant K (KELIM) Is a Marker of Chemosensitivity in Patients with Ovarian Cancer: Results from the Phase II CHIVA Trial
Source: Oxford University Press journal article supplement (doi:10.1158/1078-0432.ccr-20-0054), 2020-03-24
Supplement: 10780432ccr200054-sup-235134_2_supp_6150214_q6z36d.docx [file 10780432ccr200054-sup-235134_2_supp_6150214_q6z36d.docx]

Supplementary Table 2. Typical parameter estimates from the final semi-mechanistic model.

| N = 134 | Estimate | RSE* on estimate (%) | IIV** (%CV) | RSE*** on IIV (%) | Shrinkage*** (%) |
| --- | --- | --- | --- | --- | --- |
|  |  |  |  |  |  |
| K (D-1) | 8.79E-01 | 6 | 14 | 56 | 98 |
| KPROD (IU.mL-1.D-1) | 1.01E+00 | 21 | 53 | 139 | 63 |
| E50 (A.U.) | 5.26E-01 | 8 | 19 | 40 | 98 |
| KELIM (D-1) | 4.55E-02 | 9 | 67 | 13 | 7.8 |
| CA0 (IU.mL-1) | 1.29E+03 | 14 | 137 | 7 | 5.3 |

* Relative standard error calculated as (standard error/estimated parameter) × 100.

** Interindividual coefficient of variation calculated as square root(variance of random effect) × 100.

*** Percentage on standard deviation scale.

Note: RSE was computed using boostrap of 500 samples
